# Supplementary material for: Analysis of ROH patterns in the Noriker horse breed reveals signatures of selection for coat color and body size
Source: PubMed Central journal article supplement — Anim Genet. 2019 Jun 14;50(4):334–46. doi: 10.1111/age.12797 (PMC6617995; doi:10.1111/age.12797), 2019-06-14
Supplement: AGE-50-334-s004.pdf [file AGE-50-334-s004.pdf]

**Table S2** Gene Ontology (GO) terms and KEGG pathways enriched ( $P < 0.05$ ) based on annotated genes within ROH islands for the chestnut Noriker sample

| Category           | Term                                                                    | p-value | Genes                                                         | Fold Enrichment | Bonferroni adjusted p-value |
|--------------------|-------------------------------------------------------------------------|---------|---------------------------------------------------------------|-----------------|-----------------------------|
| Biological process | GO:0048704~embryonic skeletal system morphogenesis                      | <0.001  | <i>HOXB3, HOXB1, PCGF2, HOXB2, HOXB7, HOXB8, HOXB5, HOXB6</i> | 47.73           | 0.000                       |
|                    | GO:0009952~anterior/posterior pattern specification                     | <0.001  | <i>HOXB3, HOXB1, PCGF2, HOXB2, HOXB7, HOXB8, HOXB5, HOXB6</i> | 22.09           | 0.000                       |
|                    | GO:0021570~rhombomere 4 development                                     | 0.011   | <i>HOXB1, HOXB2</i>                                           | 184.97          | 0.917                       |
|                    | GO:0010482~regulation of epidermal cell division                        | 0.016   | <i>KDF1, SFN</i>                                              | 123.31          | 0.976                       |
|                    | GO:0043410~positive regulation of MAPK cascade                          | 0.025   | <i>CDK10, BANK1, NGFR</i>                                     | 12.06           | 0.997                       |
|                    | GO:0045606~positive regulation epidermal cell differentiation           | 0.032   | <i>KDF1, SFN</i>                                              | 61.66           | 0.999                       |
|                    | GO:0021612~facial nerve structural organization                         | 0.042   | <i>HOXB1, HOXB2</i>                                           | 46.24           | 0.999                       |
|                    | GO:0003334~keratinocyte development                                     | 0.042   | <i>KDF1, SFN</i>                                              | 46.24           | 0.999                       |
| Cellular component | GO:0005776~autophagosome                                                | 0.013   | <i>OSBPL7, CALCOCO2, PIP4K2B</i>                              | 16.71           | 0.670                       |
| Molecular function | GO:0003700~transcription factor activity, sequence-specific DNA binding | 0.002   | <i>ZNF304, KAT7, HOXB2, HOXB7, HOXB8, HOXB6, ZFAT, TCF25</i>  | 4.32            | 0.139                       |
|                    | GO:0043565~sequence-specific DNA binding                                | 0.037   | <i>HOXB1, HOXB2, HOXB7, HOXB6, HOXB13</i>                     | 3.89            | 0.931                       |
| KEGG pathway       | ecb03010:Ribosome                                                       | 0.049   | <i>MRPL10, RPL23, RPL13</i>                                   | 7.98            | 0.864                       |
