# Supplementary material for: Analysis of ROH patterns in the Noriker horse breed reveals signatures of selection for coat color and body size
Source: PubMed Central journal article supplement — Anim Genet. 2019 Jun 14;50(4):334–46. doi: 10.1111/age.12797 (PMC6617995; doi:10.1111/age.12797), 2019-06-14
Supplement: AGE-50-334-s007.pdf [file AGE-50-334-s007.pdf]

**Table S5** Gene Ontology (GO) terms and KEGG pathways enriched ( $P < 0.05$ ) based on annotated genes within ROH islands for the blue roan Noriker sample

| Category           | Term                                                                    | p-value | Genes                                                                    | Fold Enrichment | Bonferroni adjusted p-value |
|--------------------|-------------------------------------------------------------------------|---------|--------------------------------------------------------------------------|-----------------|-----------------------------|
| Biological process | GO:0048704~embryonic skeletal system morphogenesis                      | <0,001  | <i>HOXB3, HOXB1, HOXB2, HOXB7, HOXB8, HOXB5, HOXB6</i>                   | 84,84           | 0,000                       |
|                    | GO:0009952~anterior/posterior pattern specification                     | <0,001  | <i>HOXB3, HOXB1, HOXB2, HOXB7, HOXB8, HOXB5, HOXB6</i>                   | 39,25           | 0,000                       |
|                    | GO:0021570~rhombomere 4 development                                     | 0,005   | <i>HOXB1, HOXB2</i>                                                      | 375,72          | 0,476                       |
|                    | GO:0021612~facial nerve structural organization                         | 0,020   | <i>HOXB1, HOXB2</i>                                                      | 93,93           | 0,924                       |
|                    | GO:0001525~angiogenesis                                                 | 0,026   | <i>HOXB3, HOXB13, TMEM100</i>                                            | 11,62           | 0,962                       |
| Cellular component | GO:0005634~nucleus                                                      | 0,030   | <i>HOXB3, HLF, HOXB1, HOXB2, SP2, HOXB8, HOXB5, HOXB6, SP6, CDK5RAP3</i> | 2,11            | 0,699                       |
|                    | GO:0005654~nucleoplasm                                                  | 0,049   | <i>MRPL10, UBE2Z, HOXB7, SNF8, PNPO, HOXB13, KPNB1</i>                   | 2,49            | 0,857                       |
| Molecular function | GO:0043565~sequence-specific DNA binding                                | 0,002   | <i>HOXB1, HOXB2, HOXB7, HOXB6, HOXB13</i>                                | 8,82            | 0,066                       |
|                    | GO:0003700~transcription factor activity, sequence-specific DNA binding | 0,007   | <i>HOXB2, HOXB7, HOXB8, HOXB6, ZFAT</i>                                  | 6,13            | 0,222                       |
